# Supplementary material for: Income-based U.S. household carbon footprints (1990–2019) offer new insights on emissions inequality and climate finance
Source: PLOS journal article supplement (doi:10.1371/journal.pclm.0000190), 2023-08-17
Supplement: S23 (10.1371/journal.pclm.0000190.s023) [file journal.pclm.0000190.s023]

## Sheet: Fig F & G (Producer)
year	Decile	n	mean (t CO2e)	national emissions share
1990	Decile 1	5839	2.85385	0.00538491
1990	Decile 2	5990	10.2267	0.0192966
1990	Decile 3	5991	18.1265	0.0342028
1990	Decile 4	5991	26.1717	0.0493831
1990	Decile 5	5992	35.4583	0.066906
1990	Decile 6	5989	45.6719	0.0861779
1990	Decile 7	5991	57.6681	0.108814
1990	Decile 8	6003	70.8619	0.133709
1990	Decile 9	5997	90.8222	0.171372
1990	Next 9%	5700	136.698	0.232141
1990	Next 0.9%	1000	332.889	0.0565313
1990	Top 0.1%	1000	1912.25	0.036082
1991	Decile 1	5864	2.63834	0.00502231
1991	Decile 2	5993	10.3343	0.0196723
1991	Decile 3	5984	18.0431	0.0343466
1991	Decile 4	6121	26.6756	0.0507794
1991	Decile 5	5876	35.5175	0.0676108
1991	Decile 6	5969	45.3936	0.0864108
1991	Decile 7	5988	57.0346	0.10857
1991	Decile 8	5989	70.9185	0.135
1991	Decile 9	5992	89.8526	0.171042
1991	Next 9%	5748	136.367	0.233628
1991	Next 0.9%	1000	320.241	0.0548646
1991	Top 0.1%	1000	1736.32	0.0330524
1992	Decile 1	5719	2.36168	0.00443237
1992	Decile 2	5898	9.7487	0.0182963
1992	Decile 3	5900	17.2182	0.0323149
1992	Decile 4	5920	25.8556	0.0485256
1992	Decile 5	5901	34.7475	0.0652137
1992	Decile 6	5911	45.6665	0.0857064
1992	Decile 7	5918	58.0025	0.108859
1992	Decile 8	5917	72.1125	0.13534
1992	Decile 9	5918	92.3563	0.173333
1992	Next 9%	5583	139.168	0.235071
1992	Next 0.9%	1000	335.814	0.0567228
1992	Top 0.1%	1000	1928.06	0.0361856
1993	Decile 1	5714	2.46058	0.00452922
1993	Decile 2	5885	9.746	0.0179396
1993	Decile 3	5894	17.3138	0.0318697
1993	Decile 4	5890	25.9556	0.0477768
1993	Decile 5	5890	35.7366	0.0657807
1993	Decile 6	5891	46.0976	0.0848524
1993	Decile 7	5893	58.3501	0.107406
1993	Decile 8	5894	74.5015	0.137136
1993	Decile 9	5894	94.4426	0.173842
1993	Next 9%	5552	143.442	0.237632
1993	Next 0.9%	1000	340.739	0.0564482
1993	Top 0.1%	1000	1889.95	0.0347885
1994	Decile 1	5484	2.08597	0.00413594
1994	Decile 2	5694	8.78962	0.0174276
1994	Decile 3	5699	15.6032	0.0309371
1994	Decile 4	5695	23.8168	0.0472226
1994	Decile 5	5704	32.4391	0.0643185
1994	Decile 6	5699	42.5835	0.0844322
1994	Decile 7	5702	54.5006	0.108061
1994	Decile 8	5704	68.8916	0.136594
1994	Decile 9	5700	88.9459	0.176357
1994	Next 9%	5281	133.347	0.237953
1994	Next 0.9%	991	323.547	0.057736
1994	Top 0.1%	991	1756.4	0.0348249
1995	Decile 1	5479	2.1535	0.00445234
1995	Decile 2	5771	8.65064	0.0178851
1995	Decile 3	5598	15.1819	0.0313882
1995	Decile 4	5682	22.3882	0.0462872
1995	Decile 5	5684	30.7487	0.0635724
1995	Decile 6	5687	40.2824	0.0832832
1995	Decile 7	5688	51.2685	0.105997
1995	Decile 8	5689	64.9634	0.134311
1995	Decile 9	5689	84.2738	0.174235
1995	Next 9%	5248	128.717	0.239509
1995	Next 0.9%	986	328.658	0.0611546
1995	Top 0.1%	986	1834.41	0.0379262
1996	Decile 1	4767	2.35869	0.00499037
1996	Decile 2	4962	8.64996	0.018301
1996	Decile 3	4992	14.9829	0.0316998
1996	Decile 4	4938	21.9353	0.0464093
1996	Decile 5	4963	30.0203	0.0635151
1996	Decile 6	4966	38.892	0.0822852
1996	Decile 7	4967	49.8491	0.105468
1996	Decile 8	4966	62.4448	0.132117
1996	Decile 9	4967	81.0337	0.171446
1996	Next 9%	4419	125.158	0.238321
1996	Next 0.9%	1000	335.282	0.0638432
1996	Top 0.1%	1000	1966.42	0.0416043
1997	Decile 1	4837	2.3558	0.00515678
1997	Decile 2	5022	8.44288	0.0184812
1997	Decile 3	5025	14.4925	0.0317237
1997	Decile 4	5031	21.3121	0.0466516
1997	Decile 5	5030	28.6585	0.0627326
1997	Decile 6	5030	37.566	0.0822308
1997	Decile 7	5029	47.2589	0.103448
1997	Decile 8	5031	59.7091	0.130701
1997	Decile 9	5031	77.3174	0.169245
1997	Next 9%	4393	118.647	0.233742
1997	Next 0.9%	1000	348.28	0.0686137
1997	Top 0.1%	1000	2159.57	0.0472723
1998	Decile 1	4807	2.34898	0.00550778
1998	Decile 2	5038	8.08258	0.0189517
1998	Decile 3	5021	13.5636	0.0318033
1998	Decile 4	5028	19.9987	0.0468921
1998	Decile 5	5033	26.8134	0.0628709
1998	Decile 6	5031	34.8599	0.0817378
1998	Decile 7	5032	44.0127	0.103199
1998	Decile 8	5031	55.5352	0.130216
1998	Decile 9	5031	72.3295	0.169595
1998	Next 9%	4321	111.341	0.23496
1998	Next 0.9%	1000	316.209	0.0667289
1998	Top 0.1%	1000	2027.4	0.0475375
1999	Decile 1	4801	2.50623	0.00595188
1999	Decile 2	5070	8.11012	0.0192602
1999	Decile 3	5073	13.6632	0.0324477
1999	Decile 4	5074	20.0745	0.0476735
1999	Decile 5	5074	26.5604	0.0630765
1999	Decile 6	5074	34.3179	0.0814991
1999	Decile 7	5071	43.567	0.103464
1999	Decile 8	5071	54.4554	0.129322
1999	Decile 9	5068	71.2953	0.169314
1999	Next 9%	4313	108.258	0.231385
1999	Next 0.9%	1000	313.467	0.0669988
1999	Top 0.1%	1000	2088.86	0.0496069
2000	Decile 1	4869	2.93866	0.00667626
2000	Decile 2	5095	8.6607	0.019676
2000	Decile 3	5098	14.238	0.0323468
2000	Decile 4	5095	20.3972	0.0463398
2000	Decile 5	5097	27.455	0.0623743
2000	Decile 6	5098	34.9895	0.0794916
2000	Decile 7	5094	44.2594	0.100552
2000	Decile 8	5097	56.5685	0.128516
2000	Decile 9	5092	72.8365	0.165475
2000	Next 9%	4385	114.778	0.234684
2000	Next 0.9%	1000	339.729	0.0694637
2000	Top 0.1%	1000	2394.73	0.0544051
2001	Decile 1	7404	2.89523	0.00651425
2001	Decile 2	7796	9.03749	0.0203343
2001	Decile 3	7799	15.4157	0.0346853
2001	Decile 4	7798	22.0069	0.0495155
2001	Decile 5	7798	28.8844	0.0649899
2001	Decile 6	7799	36.8611	0.0829373
2001	Decile 7	7799	46.0681	0.103653
2001	Decile 8	7788	57.6911	0.129805
2001	Decile 9	7792	74.23	0.167017
2001	Next 9%	6194	111.65	0.226092
2001	Next 0.9%	1000	325.028	0.0658182
2001	Top 0.1%	1000	2161.68	0.0486378
2002	Decile 1	7391	2.67083	0.00618503
2002	Decile 2	7820	8.56965	0.0198453
2002	Decile 3	7814	14.7376	0.0341289
2002	Decile 4	7818	21.1377	0.04895
2002	Decile 5	7821	28.1123	0.0651014
2002	Decile 6	7818	36.0403	0.083461
2002	Decile 7	7816	45.3481	0.105016
2002	Decile 8	7812	56.3609	0.130519
2002	Decile 9	7811	72.5449	0.167997
2002	Next 9%	6134	108.429	0.225987
2002	Next 0.9%	1000	314.841	0.0656188
2002	Top 0.1%	1000	2037.84	0.0471915
2003	Decile 1	7446	2.42199	0.00565227
2003	Decile 2	7799	8.20312	0.0191439
2003	Decile 3	7822	14.4081	0.0336247
2003	Decile 4	7822	20.8312	0.0486145
2003	Decile 5	7828	27.727	0.0647074
2003	Decile 6	7818	35.7218	0.0833649
2003	Decile 7	7817	44.5943	0.104071
2003	Decile 8	7817	55.6012	0.129758
2003	Decile 9	7816	71.9257	0.167855
2003	Next 9%	6649	108.759	0.228432
2003	Next 0.9%	1000	312.654	0.0656685
2003	Top 0.1%	1000	2104.23	0.0491072
2004	Decile 1	7293	2.22346	0.00525765
2004	Decile 2	7713	7.92011	0.0187281
2004	Decile 3	7707	14.0857	0.0333075
2004	Decile 4	7706	20.3537	0.0481288
2004	Decile 5	7711	27.1851	0.0642826
2004	Decile 6	7710	34.8015	0.0822926
2004	Decile 7	7709	43.9791	0.103994
2004	Decile 8	7703	54.3424	0.1285
2004	Decile 9	7703	70.3428	0.166335
2004	Next 9%	6838	107.05	0.22782
2004	Next 0.9%	1000	322.41	0.0686142
2004	Top 0.1%	1000	2230.39	0.0527404
2005	Decile 1	7176	2.12195	0.0052209
2005	Decile 2	7743	7.5008	0.0184551
2005	Decile 3	7535	13.0379	0.0320787
2005	Decile 4	7638	19.1589	0.0471389
2005	Decile 5	7639	25.6432	0.0630931
2005	Decile 6	7635	32.9731	0.0811278
2005	Decile 7	7632	41.5534	0.102239
2005	Decile 8	7637	52.18	0.128385
2005	Decile 9	7636	67.1203	0.165144
2005	Next 9%	6811	102.541	0.227065
2005	Next 0.9%	1000	327.246	0.0724648
2005	Top 0.1%	1000	2340.54	0.0575872
2006	Decile 1	7160	2.14671	0.00529761
2006	Decile 2	7577	7.38497	0.0182245
2006	Decile 3	7562	12.7614	0.0314924
2006	Decile 4	7571	18.7381	0.0462415
2006	Decile 5	7679	25.1871	0.0621563
2006	Decile 6	7502	32.7467	0.0808116
2006	Decile 7	7585	40.746	0.100552
2006	Decile 8	7588	51.6024	0.127343
2006	Decile 9	7590	66.0962	0.163111
2006	Next 9%	6643	102.8	0.22832
2006	Next 0.9%	1000	339.365	0.0753732
2006	Top 0.1%	1000	2474.97	0.0610767
2007	Decile 1	7084	2.25116	0.00559816
2007	Decile 2	7532	7.64835	0.0190198
2007	Decile 3	7515	13.2461	0.0329403
2007	Decile 4	7524	18.8283	0.046822
2007	Decile 5	7545	25.2304	0.0627427
2007	Decile 6	7541	32.4395	0.08067
2007	Decile 7	7541	40.6455	0.101077
2007	Decile 8	7543	51.252	0.127453
2007	Decile 9	7540	65.9878	0.164097
2007	Next 9%	6534	100.331	0.224551
2007	Next 0.9%	1000	329.582	0.0737639
2007	Top 0.1%	1000	2463.64	0.0612654
2008	Decile 1	7118	2.2245	0.00568554
2008	Decile 2	7562	7.37523	0.0188502
2008	Decile 3	7555	12.8261	0.0327819
2008	Decile 4	7582	18.5417	0.0473904
2008	Decile 5	7574	24.91	0.0636669
2008	Decile 6	7578	31.9391	0.0816322
2008	Decile 7	7579	40.211	0.102774
2008	Decile 8	7581	50.3409	0.128665
2008	Decile 9	7574	64.3475	0.164464
2008	Next 9%	6646	97.4082	0.224067
2008	Next 0.9%	1000	307.199	0.0706646
2008	Top 0.1%	1000	2322.41	0.059358
2009	Decile 1	7176	2.13623	0.00557222
2009	Decile 2	7546	7.30189	0.0190466
2009	Decile 3	7599	12.4443	0.0324601
2009	Decile 4	7615	18.0875	0.0471802
2009	Decile 5	7594	24.3177	0.0634313
2009	Decile 6	7608	31.5466	0.0822875
2009	Decile 7	7613	39.5954	0.103282
2009	Decile 8	7612	49.9661	0.130334
2009	Decile 9	7616	64.4547	0.168126
2009	Next 9%	6443	96.6578	0.226914
2009	Next 0.9%	1000	291.196	0.0683611
2009	Top 0.1%	1000	2032.04	0.0530046
2010	Decile 1	7347	1.74958	0.00482734
2010	Decile 2	7403	6.56137	0.0181037
2010	Decile 3	7602	11.13	0.0307093
2010	Decile 4	7593	16.4811	0.0454735
2010	Decile 5	7605	22.212	0.0612859
2010	Decile 6	7609	28.8659	0.079645
2010	Decile 7	7611	36.6827	0.101213
2010	Decile 8	7612	46.5018	0.128305
2010	Decile 9	7620	60.6535	0.167351
2010	Next 9%	6568	92.1675	0.228872
2010	Next 0.9%	1000	302.494	0.0751159
2010	Top 0.1%	1000	2141.93	0.0590987
2011	Decile 1	6999	1.26781	0.00371667
2011	Decile 2	7490	5.74292	0.0168358
2011	Decile 3	7492	9.96724	0.0292197
2011	Decile 4	7490	14.7947	0.0433716
2011	Decile 5	7503	20.5318	0.0601906
2011	Decile 6	7500	26.6302	0.0780682
2011	Decile 7	7507	34.1364	0.100073
2011	Decile 8	7511	42.9294	0.12585
2011	Decile 9	7513	56.383	0.165291
2011	Next 9%	7104	90.4154	0.238553
2011	Next 0.9%	1000	290.462	0.076636
2011	Top 0.1%	1000	2121.52	0.0621939
2012	Decile 1	6952	1.29034	0.00379557
2012	Decile 2	7485	5.68757	0.0167302
2012	Decile 3	7361	9.93922	0.0292366
2012	Decile 4	7481	14.636	0.0430523
2012	Decile 5	7367	19.9833	0.0587817
2012	Decile 6	7429	25.8798	0.0761265
2012	Decile 7	7431	33.1376	0.0974755
2012	Decile 8	7433	41.8729	0.123171
2012	Decile 9	7432	55.1782	0.162309
2012	Next 9%	6984	91.161	0.241338
2012	Next 0.9%	1000	303.362	0.0803117
2012	Top 0.1%	1000	2300.55	0.0676717
2013	Decile 1	7057	1.42887	0.00415114
2013	Decile 2	7428	5.814	0.0168908
2013	Decile 3	7752	10.1434	0.0294685
2013	Decile 4	7184	15.0183	0.043631
2013	Decile 5	7478	20.1851	0.0586417
2013	Decile 6	7471	26.4871	0.0769502
2013	Decile 7	7478	33.7451	0.0980359
2013	Decile 8	7480	43.0965	0.125204
2013	Decile 9	7479	56.9232	0.165373
2013	Next 9%	7026	91.6593	0.239659
2013	Next 0.9%	1000	298.967	0.0781701
2013	Top 0.1%	1000	2196.92	0.0638248
2014	Decile 1	6985	1.57961	0.00428111
2014	Decile 2	7585	6.45667	0.0174991
2014	Decile 3	7219	10.8856	0.0295026
2014	Decile 4	7408	15.8631	0.0429927
2014	Decile 5	7413	21.4823	0.0582221
2014	Decile 6	7409	27.7888	0.0753143
2014	Decile 7	7413	35.4266	0.0960144
2014	Decile 8	7414	45.1964	0.122493
2014	Decile 9	7415	60.0668	0.162795
2014	Next 9%	6983	98.0498	0.239164
2014	Next 0.9%	1000	340.306	0.0830079
2014	Top 0.1%	1000	2535.32	0.0687131
2015	Decile 1	6932	1.58821	0.00403247
2015	Decile 2	7535	6.80465	0.0172771
2015	Decile 3	7290	11.4973	0.0291918
2015	Decile 4	7416	16.6974	0.0423948
2015	Decile 5	7419	22.2926	0.056601
2015	Decile 6	7423	29.1391	0.0739843
2015	Decile 7	7423	37.4861	0.0951776
2015	Decile 8	7422	47.9206	0.121671
2015	Decile 9	7422	63.3581	0.160867
2015	Next 9%	7011	104.951	0.239825
2015	Next 0.9%	1000	379.144	0.0866385
2015	Top 0.1%	1000	2849.13	0.0723396
2016	Decile 1	6550	1.20959	0.00383866
2016	Decile 2	6928	5.06437	0.0160719
2016	Decile 3	6930	8.90999	0.0282761
2016	Decile 4	6945	13.4265	0.0426095
2016	Decile 5	6942	18.3796	0.0583281
2016	Decile 6	6946	23.8837	0.0757955
2016	Decile 7	6947	30.9988	0.0983754
2016	Decile 8	6946	39.9323	0.126726
2016	Decile 9	6947	53.0184	0.168256
2016	Next 9%	6501	85.6476	0.244625
2016	Next 0.9%	1000	266.781	0.0761973
2016	Top 0.1%	1000	1919.04	0.0609011
2017	Decile 1	6583	1.2214	0.00375696
2017	Decile 2	6983	5.18792	0.0159578
2017	Decile 3	6985	9.33527	0.0287148
2017	Decile 4	6990	14.0589	0.0432444
2017	Decile 5	6990	19.1256	0.0588293
2017	Decile 6	6994	24.6922	0.0759519
2017	Decile 7	6992	32.1234	0.0988098
2017	Decile 8	6994	40.9184	0.125863
2017	Decile 9	6993	53.7367	0.165291
2017	Next 9%	6479	88.5146	0.24504
2017	Next 0.9%	1000	274.268	0.075927
2017	Top 0.1%	1000	2035.61	0.0626142
2018	Decile 1	6379	1.37007	0.00419607
2018	Decile 2	6777	5.27734	0.0161628
2018	Decile 3	6778	9.25387	0.0283416
2018	Decile 4	6786	13.8612	0.0424522
2018	Decile 5	6788	19.0292	0.0582803
2018	Decile 6	6789	24.8662	0.0761572
2018	Decile 7	6789	31.7728	0.0973099
2018	Decile 8	6789	41.1111	0.12591
2018	Decile 9	6789	53.7163	0.164516
2018	Next 9%	6358	89.4259	0.246494
2018	Next 0.9%	1000	280.21	0.0772373
2018	Top 0.1%	1000	2055.16	0.0629429
2019	Decile 1	6489	1.27515	0.00397472
2019	Decile 2	6824	5.06608	0.0157913
2019	Decile 3	6827	8.70196	0.0271245
2019	Decile 4	6828	13.0677	0.0407328
2019	Decile 5	6833	18.0372	0.0562229
2019	Decile 6	6934	23.9344	0.0746049
2019	Decile 7	6727	30.7065	0.0957137
2019	Decile 8	6833	39.3841	0.122763
2019	Decile 9	6834	52.8346	0.164688
2019	Next 9%	6351	89.2066	0.250256
2019	Next 0.9%	1000	293.658	0.0823814
2019	Top 0.1%	1000	2109.27	0.0657471
